# Supplementary material for: Nonlinear chemical reaction induced abnormal pattern formation of chemotactic particles
Source: Royal Society of Chemistry journal article supplement (doi:10.1039/d2sm01433e), 2023-01-01
Supplement: d2sm01433e3.pdf [file d2sm01433e3.pdf]

Supplementary Information for

**Nonlinear Chemical Reaction Induced Abnormal Pattern  
Formation of Chemotactic Particles**

Xianyun Jiang, Huijun Jiang\*, Zhonghuai Hou\*

Department of Chemical Physics, Hefei National Research Center for Physical Sciences at the  
Microscale & Key Laboratory of Precision and Intelligent Chemistry, University of Science and  
Technology of China, Hefei, Anhui 230026, China

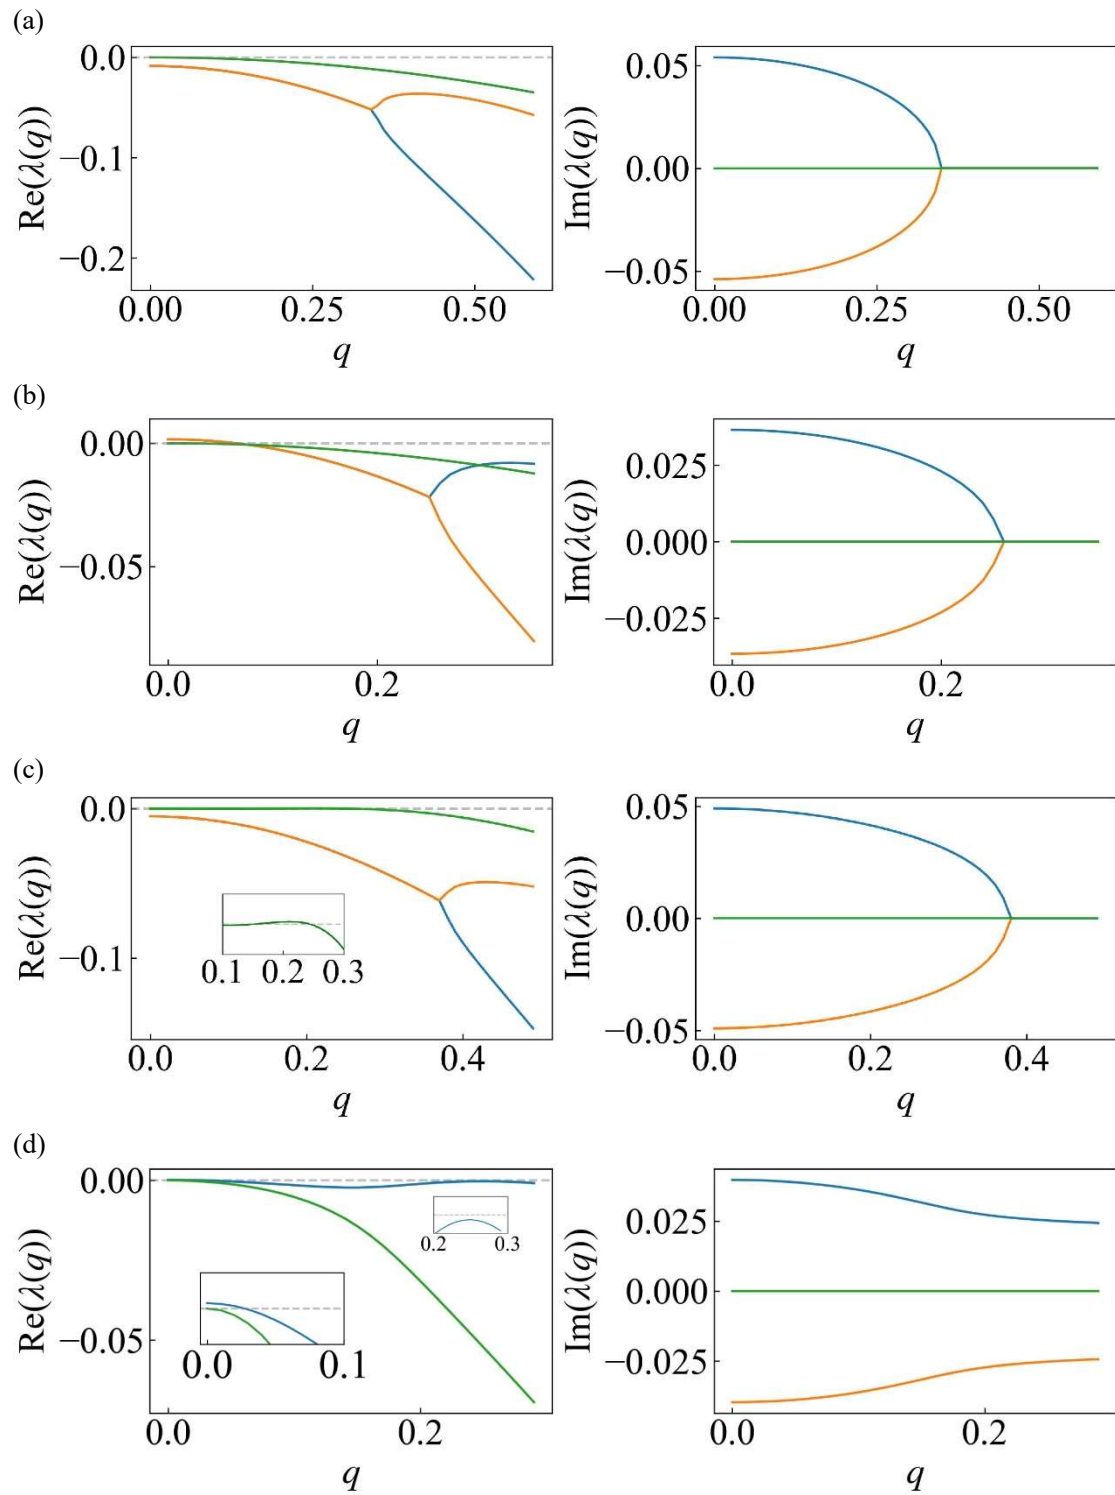

**Supplementary Figure 1** Real and imaginary part of the dispersion relation  $\lambda$ . Parameters are  $\alpha_u = 0.0, k_u = -0.01$ (a)  $\alpha_u = 0.0, k_u = -0.0175$ (b)  $\alpha_u = 5.0, k_u = -0.0071$ (c)  $\alpha_u = -5.0, k_u = -0.0175$ (d). Other parameters are the same as in the main article.
